1  
2  
3  
4  
5  
6  
7  
8  
9  
10  
11  
12  
13  
14  
15  
16  
17  
18  
19  
20  
21  
22  
23  
24  
25

### Physical and functional cell-matrix uncoupling in a developing tissue under tension

Amscha Proag<sup>1</sup>, Bruno Monier<sup>1</sup> and Magali Suzanne<sup>1\*</sup>

\* Corresponding author

<sup>1</sup> LBCMCP, Centre de Biologie Intégrative (CBI), Université de Toulouse, CNRS, UPS, France

#### Abstract:

Tissue mechanics play a crucial role in organ development. It relies on cells and extracellular matrix (ECM) mechanical properties, but also on their reciprocal interaction. The relative physical contribution of cells and ECM to morphogenesis is poorly understood. Here, we dissected the mechanics of the envelope of the *Drosophila* developing leg, an epithelium submitted to a number of mechanical stresses: first stretched, it is then torn apart and withdrawn to free the leg. During stretching, we found that mechanical tension is entirely borne by the ECM at first, then by the cellular monolayer as soon as they detach themselves from one another. Then, each envelope layer is removed by an independent mechanism: while ECM withdraws following local proteolysis, cellular monolayer withdrawal is independent of ECM degradation and driven by an autonomous myosin-II-dependent contraction. These results reveal a physical and functional cell-matrix uncoupling that could timely control tissue dynamics during development.

#### INTRODUCTION

For many years, research has focused on genetic and biochemical regulation of developmental processes. More recently, the development of new approaches based on live-imaging and micromanipulation has brought novel insight into the physical properties of cells and tissues during

26 morphogenesis, demonstrating the importance of cells and tissues mechanics during development  
27 (Monier, et al., 2015; Heisenberg and Bellaïche, 2013; Fernandez-Gonzalez and Zallen, 2011;  
28 Blankenship, et al., 2006; Bertet, et al., 2004). Tissues have viscoelastic properties that depend for the  
29 most part on the architecture and dynamics of both cytoskeletal networks and extracellular matrix  
30 (ECM) (Ingber, 2006). On the one hand, cell contractility relies mainly on the activity of acto-myosin, a  
31 macromolecular machinery composed of self-assembled actin filaments and non-muscle myosin II  
32 (Lecuit, et al., 2011). On the other hand, the extracellular matrix, which consists in a meshwork of  
33 multiple components including collagen IV, laminins and perlecan, provides support to the epithelium  
34 (Miller, 2017; Theocharis, et al., 2016).

35 A key question in the field is the contribution of mechanical signals during long-term  
36 development and how these signals are integrated during morphogenetic processes (Gilmour, et al.,  
37 2017; Keller, 2012). The role of mechanics in tissue deformation is beginning to be well characterized  
38 at a local scale, during relatively short periods of time and considering the epithelial sheet as a single  
39 viscoelastic entity. However, characterizing global tissue mechanics taking into account the respective  
40 role of ECM and cell layer over long timescales remains difficult due to technical limitations. In  
41 particular, how the mechanical properties of cells and the extracellular matrix integrate to confer its  
42 physical properties to the tissue remains poorly understood in living organisms (Daley and Yamada,  
43 2013).

44 To characterize the respective contribution of cells and the matrix in tissue morphogenesis, we  
45 took advantage of the isolated developmental system that is the *Drosophila* leg disc. The *Drosophila*  
46 leg disc has a relatively simple organization. It is composed of two juxtaposed tissues, the peripodial  
47 envelope and the leg proper. The peripodial envelope surrounds the developing leg, and both tissues  
48 are joined together at the proximal region of the disc (Fig1a). As any mature epithelium, the envelope  
49 is composed of a cell monolayer and an underlying extracellular matrix (ECM) called the basement  
50 membrane. Furthermore, cell division is mostly absent and the pool of extracellular matrix

51 components is not renewed (see below). Thus, with a given number of cells and a given amount of  
52 matrix, imaginal disc development constitutes a relatively simple model system to address the  
53 contribution of mechanics in a developing tissue. Interestingly, the basement membrane forms the  
54 outer most layer of the leg disc with the cell monolayer lying right underneath and constituting a very  
55 thin squamous epithelium. This configuration makes the envelope easily accessible to  
56 micromanipulation. Furthermore, imaginal discs develop normally in culture (Aldaz, et al., 2013; Aldaz,  
57 et al., 2010; Fristrom and Fristrom, 1993), indicating that they behave as independent entities whose  
58 mechanics can be characterized throughout the whole evagination process. Using this model, we  
59 dissect the mechanical properties of a tissue under tension, the leg disc envelope, and identify specific  
60 contributions and dynamics of epithelial versus matrix layers during development.

61 We show that although the matrix initially supports all the stress, the epithelium quickly  
62 detaches from the matrix and becomes highly tensed. Then, in a second phase, the envelope ruptures  
63 allowing appendage eversion. It has been proposed previously that matrix degradation by MMPs was  
64 an essential step in envelope removal in the wing disc (Srivastava, et al., 2007). However, our data  
65 reveal that the biochemical signal of MMP production, a prerequisite for subsequent eversion, is not  
66 sufficient for envelope removal. Indeed, we discover that both layers of the envelope, the matrix and  
67 the cell monolayer, rupture and withdraw independently from one another, driven by a combination  
68 of biochemical and mechanical signals: the extracellular matrix is locally degraded by matrix  
69 metalloproteases and the cell monolayer withdraws autonomously through an increase of myosin II-  
70 dependent cell contractility. Thus, these data reveal physical and functional cell-matrix uncoupling  
71 during a developmental process.

72

## 73 **RESULTS**

### 74 **I. Envelope stretching, tearing and removal during leg elongation:**

75

76           During metamorphosis, leg discs evert, going from a flat to a tubular elongated structure that  
77   prefigures the adult leg (von Kalm, et al., 1995; Fristrom and Fristrom, 1993; Milner, 1977). Following  
78   the global dynamics of the envelope during leg evagination by time-lapse fluorescence microscopy, we  
79   discovered that the process is very stereotyped and proceeds through the following steps (Fig1b, FigS1  
80   and Movie1):

81           - First (Fig1c, phase I), the leg elongates, a process that relies on cell shape changes and  
82   rearrangements (Condic, et al., 1991). While leg elongation progresses regularly, the peripodial  
83   envelope gradually gets more and more stretched.

84           - Then, leg elongation slows down to a plateau (Fig1c) and envelope stretching reaches its  
85   maximum. This stage can be divided into two different phases, before and after envelope rupture.  
86   Before rupture (phase II), the leg bends dorsally (Fig1d). Then, the envelope breaks open at the dorsal  
87   tip and starts to retract (phase III). While envelope retraction proceeds, the bending of the leg relaxes.  
88   Leg elongation remains negligible while the envelope retracts from dorsal to ventral.

89           - Lastly, the envelope is totally removed and leg elongation resumes (Fig1c, phase IV).

90           These observations strongly suggest constant mechanical interplay between the leg and the  
91   envelope. Indeed, leg elongation coincides with envelope stretching and both movements slow down  
92   at the same time, suggesting that leg elongation is responsible for envelope stretching, but that it is  
93   restrained when the envelope reaches a state of maximal tension. Then the leg bends dorsally in the  
94   direction of the future rupture site, relaxing only after the envelope breaks. Finally, once the envelope  
95   is totally removed, the leg elongates again, free from external constraint.

96           These observations highlight the fact that the peripodial envelope undergoes a number of  
97   mechanical stresses during leg development: it is progressively stretched, then breaks stereotypically  
98   at the dorsal tip before finally retracting. Focusing here on both the extracellular matrix and the cell  
99   monolayer of the peripodial envelope, our goal was to determine the impact of mechanics on the

100 envelope throughout the whole process as well as the mechanical versus biochemical contribution to  
101 envelope behavior.

102

103 **II. Physical uncoupling of the ECM from the cell monolayer during envelope**  
104 **stretching:**

105

106 As mentioned above, the envelope is composed of an epithelial cell monolayer lying on ECM.  
107 Previous work has proposed that disc eversion relies on ECM degradation by matrix metalloproteases  
108 (Srivastava, et al., 2007). Yet, to date, matrix dynamics have never been followed along the whole  
109 process in a living tissue. Since the matrix contributes to tissue mechanics (Ingber, 2006), we asked  
110 whether its remodeling could alter the mechanical properties of the envelope. Thus, we analyzed the  
111 dynamics of fluorescent matrix components (collagen IV and perlecan) and observed that (1) the pool  
112 of matrix appears unchanged during leg elongation, as evidenced by the lack of fluorescence recovery  
113 several hours after photobleaching (overnight culture, not shown) and (2) the ECM is progressively  
114 remodeled during leg elongation. Initially, the matrix is rather homogeneously distributed in the whole  
115 tissue; however, as stretching progresses, the matrix becomes sparser in the distal part of the  
116 envelope. High-resolution images reveal small gaps in the matrix layer (Fig2a). This may indicate either  
117 that the concentration of matrix components was too close to background fluorescence intensity, *i.e.*,  
118 below our level of detection, or that the matrix actually ruptures in some small regions. Eventually, the  
119 matrix is locally degraded at the dorsal tip of the envelope, as shown by the appearance of a hole in  
120 the collagen IV network at the dorsal tip of the envelope layer (Fig2b and Movie 2). Strikingly, the  
121 rupture of the underlying epithelium occurs slightly later. Indeed, the hole in the matrix was always  
122 observed before epithelial rupture (Fig2b and Movie 2). This suggests that the matrix and the cell  
123 monolayer behave independently at the time of rupture. Indeed, during phase I, the ECM and the cell  
124 monolayer display correlated local deformations (Fig2c). By contrast, as from phase II, the ECM and

125 the monolayer frequently present independent motion (Fig2d). Together, these data point towards a  
126 gradual uncoupling of the two layers from each other.

### 127 **III. Independent removal of the ECM and cellular layers of the envelope:**

128

129 The initial hypothesis that matrix degradation by matrix metalloproteases (MMPs) may be  
130 sufficient to explain envelope rupture (Srivastava, et al., 2007) was consistent with the idea that cell-  
131 matrix attachment is essential to maintain epithelial integrity and that local matrix degradation would  
132 thus disrupt the whole envelope. However, recent work has demonstrated that a monolayer  
133 epithelium can be maintained without matrix (Harris, et al., 2012). Together with our observations,  
134 these data suggest that epithelial rupture might be regulated independently of matrix degradation. To  
135 test this idea, we prevented matrix degradation by inhibiting MMPs and followed envelope dynamics.

136 When MMPs are inhibited during prepupal stages, the matrix is degraded normally,  
137 progressively retracts and the leg everts (data not shown). However, when MMPs are inhibited earlier,  
138 at the end of the third larval stage (L3), local degradation of the matrix at the dorsal tip was prevented.  
139 Interestingly, in this context, although the extracellular matrix remains intact, epithelial rupture still  
140 occurs at the correct position (Fig2e and Movie 3).

141 These results demonstrate that matrix degradation in the envelope occurs earlier than, but is  
142 not responsible for, the rupture of the cell monolayer. This reveals that the rupture events of both  
143 layers are independent of one another, and that matrix degradation by MMPs is not required for  
144 epithelium rupture and removal. This begs the question whether an active contribution of the  
145 peripodial epithelium could be involved in this process.

146

### 147 **IV. Tension transfer from the ECM to the cell layer in a stretched epithelium:**

148

149           Since the peripodial epithelium is progressively stretched during elongation, reaching a maximal  
150 length before rupture, we reasoned that the momentary slowdown of leg elongation (Phase II in Fig1c)  
151 might indicate that the envelope is under maximum strain, preventing further elongation of the leg.  
152 Thus, rupture could be a direct consequence of tissue tension.

153           To test this hypothesis, we investigated the tension pattern in the peripodial epithelium at  
154 different stages of the elongation process using laser dissection. Surprisingly, during early phases we  
155 observed negligible recoil of the cytoskeleton of peripodial cells, indicating that tension in the  
156 monolayer was low (Fig3a). Note that the same laser power led to significant recoil in the cells of the  
157 leg proper, which was indicative of efficient laser cutting (not shown). This absence of tension in the  
158 peripodial epithelium was unexpected since the highly anisotropic shape of these cells from the very  
159 start of the elongation process, together with the near absence of cell division and cell intercalation,  
160 suggested that tension might already be important at this stage (McClure and Schubiger, 2005). A  
161 possible explanation would be that the duration of the process of leg elongation (3-4h *ex vivo*) might  
162 lead to cell shape stabilization in the envelope, leading to the absence of tension, even though cells  
163 appear very elongated. Indeed, cellular deformations have been shown to be stabilized by dissipation  
164 on a scale of minutes (Clément, et al., 2017).

165           Alternatively, we reasoned that tension in the envelope could be entirely borne by the ECM.  
166 Given the low thickness matrix is (under 1  $\mu\text{m}$ ), we proceeded to cut through using high-power laser  
167 illumination to measure matrix tension. Retraction of the matrix around the cut revealed that it  
168 behaves as an elastic sheet under tension (Fig3b). These results confirmed that the envelope is under  
169 tension at the beginning of leg elongation as already shown before in other imaginal discs (Milner, et  
170 al., 1983). However, we show here that envelope tension is borne by the matrix while the underlying  
171 cell monolayer appears relaxed at this stage. Thus, the epithelial monolayer and the matrix bear  
172 different amounts of tension.

173 Later on, the mechanical properties of the envelope change drastically. Indeed, laser dissection  
174 revealed that tension strongly increases in the cell monolayer at the end of the elongation phase  
175 (Fig3c). Since the basement membrane is uncoupled from the cell monolayer at this stage, the  
176 monolayer must now also sustain the tension resulting from envelope stretching. This suggests  
177 that the epithelial monolayer would reach a state of maximal tension when envelope stretching is  
178 maximal at the end of leg elongation, just before rupture takes place.

179

## 180 **V. Active withdrawal of the cellular monolayer by myosin-dependent**

### 181 **contraction:**

182

183 Interestingly, this apparent transfer of tension in the envelope coincides with a redistribution of  
184 myosin II on the dorsal side of the peripodial epithelium. While myosin II is essentially cytoplasmic at  
185 early stage, with small accumulations forming dots, it reorganizes into supracellular cable-like  
186 structures that extend radially from the future rupture site (Fig4a and Movie 4). Consistently with this  
187 redistribution of myosin II, dorsal peripodial cells contract their apex at this stage, leading to a drastic  
188 reduction of their surface and eventually of the whole dorsal region of the envelope. Importantly, the  
189 onset of envelope contraction systematically precedes its rupture (Fig4b).

190 Altogether, these results indicate that the mechanics of the peripodial epithelium change  
191 drastically during leg elongation, in terms of both tension and contractility. Indeed, at the time of  
192 rupture, dorsal peripodial cells appear to be uncoupled from the matrix, under high tension and  
193 strongly contractile.

194 Since cell contraction in the envelope occurred just prior to epithelial rupture, we asked whether  
195 contraction could be involved in epithelial rupture and/or removal. To test this hypothesis, we  
196 attempted to inhibit contraction by targeting myosin II. Strongly inhibiting myosin II in the peripodial  
197 epithelium by genetic means (expressing dominant negative forms or RNAi) tended to alter epithelial



198 integrity. Therefore, we set up conditions in which contraction was visibly affected without notably  
199 perturbing the general organization of the tissue. In these conditions, we observed that although  
200 rupture appears to take place normally, envelope removal is prevented (Fig4c). This experiment  
201 suggests that contraction is specifically required for envelope removal.

202

## 203 **DISCUSSION**

204 In this study, we analyzed the behavior of an epithelium under tension, revealing important  
205 physical dynamics. We focused on the envelope of the *Drosophila* imaginal leg disc, which undergoes  
206 a series of modifications during leg development, including stretching, rupture and retraction.

207 During envelope stretching, we observed that tension in the envelope is first borne by the  
208 matrix, then transferred to the epithelial layer as it loses its interaction with the extracellular  
209 matrix. During this second step, peripodial epithelium breaks open independently of matrix  
210 degradation. These results bring to light a dynamical process of developmental epithelial tearing,  
211 supporting a model in which cell-matrix disengagement leads to matrix-to-cell tension transfer in order  
212 to trigger an active retraction of the cell monolayer (Fig5). Thus cell-matrix uncoupling could act as a  
213 developmental timer, and hence constitute an alternative to classical hormonal signals for the control  
214 of stereotyped organ morphogenesis.

215 Overall, these results reveal that epithelia do not necessarily lose their integrity when they lose  
216 matrix adhesion. Indeed, at least under tension, they can conserve their structure and survive  
217 independently, as previously shown for cultured cells (Wyatt, et al., 2015; Harris, et al., 2012). The  
218 influence of spreading area on cell proliferation and apoptosis has been studied for decades now  
219 (Chen, et al., 1997) and it is clear that in single adherent cells, low spreading area favors cell death.  
220 However, in a monolayer epithelium, it is not known whether the maintenance of intercellular  
221 adhesion might compensate for basal adhesion loss, hence promoting cell survival through a  
222 combination of signaling from adherens junction-linked proteins and mechanotransduction (Discher,

223 et al., 2009; Janmey, et al., 2009). Further studies are needed to determine if this is a general feature  
224 of epithelia under tension.

225 Most studies on the mechanical properties of epithelia to date have focused either on the  
226 epithelial cells or on the matrix. However, both are essential constituents of epithelia, differing notably  
227 in their composition and mechanical response and conferring particular physical properties to tissues  
228 and organs, which highlights the importance of characterizing both. Each cell can modify its shape and  
229 rigidity actively through the reorganization of cytoskeletal components and the generation of  
230 intracellular forces by molecular motors such as myosin. As for the matrix, since it does not contain  
231 any motor proteins, it is considered as a passive element, its rigidity depending directly on its  
232 composition and architecture. Here, we benefitted from the particular geometry of the envelope (a  
233 flat epithelium supported by a basement membrane forming the outer layer of the disc and thus  
234 directly accessible) and from the fact that leg tissues can accomplish their morphogenesis in culture.  
235 Thus, we could decipher the relative contribution of matrix and epithelial cells to tissue mechanics  
236 during a long-scale process of morphogenesis. Combining live imaging with biophysical approaches,  
237 we discovered that both layers of the envelope behave independently in terms of tension, rupture and  
238 withdrawal, responding to different signals, either biochemical or mechanical. Thus, under high  
239 tension, epithelial cells and their basement membrane appear to uncouple their responses, most  
240 probably due to the difference between their physical properties. Surprisingly, these results reveal that  
241 the layers constituting an epithelium, although generally viewed as interdependent, can behave  
242 independently under certain circumstances, highlighting the necessity to revisit the classical vision of  
243 epithelia.

244

## 245 **Material and Methods:**

### 246 **Fly stocks**

247 sqh-eGFP[29B] and sqh-TagRFpt[9B] (this work) are knock-in designed and generated by homologous  
248 recombination by InDroso functional genomics (Rennes, France). The respective tags were inserted in  
249 C-terminal just before the stop codon and the resulting flies were validated by sequencing.  
250 sqh::sqh-GFP on the 2nd chromosome (Royou, et al., 2002) was already described. vkg-GFP[G0454]  
251 and Trol-GFP[G00022] are Flytrap lines (Morin, et al., 2001). C855a-Gal4 and uas::zip-RNAi[7819] were  
252 obtained respectively from BDSC and VDRC.

### 253 **Sample preparation**

254 Leg discs were dissected from L3 larvae, white pupae or 2h APF prepupae in Schneider's insect medium  
255 (Sigma-Aldrich) supplemented with 15 % fetal calf serum and 0.5 % penicillin-streptomycin as well as  
256 20-hydroxyecdysone at 2 µg/mL (Sigma-Aldrich, H5142). Leg discs were transferred on a glass slide in  
257 13.5 µL of this medium confined in a 120 µm-deep double-sided adhesive spacer (Secure-Seal™ from  
258 Sigma-Aldrich) and a glass coverslip was then placed on top of the spacer. A precision glass coverslip  
259 (from Marienfeld, Germany) was used for laser dissection experiments. Halocarbon oil was added on  
260 the sides of the spacer to prevent dehydration. Dissection tools were cleaned with ethanol before  
261 dissection. For MMP inhibition experiments, leg discs were mounted in medium supplemented with  
262 GM6001 (gift from E. Théveneau, CBD, Toulouse, France) (50 µM, 0.5 % DMSO). For myosin inhibition  
263 experiments, flies were crossed at 25°C and larvae were grown at 18°C to limit Gal4 activity and avoid  
264 disrupting tissue integrity.

### 265 **Live microscopy and imaging**

266 Leg disc development was imaged using an inverted spinning disk confocal microscope (CSU-X1,  
267 Yokogawa, coupled to a Leica (resp. Zeiss) microscope) mounted with 20x/0.8 multi-immersion or  
268 40x/1.2 oil objectives (resp. 20x/0.8 air objective) and equipped with 488 nm and 561 nm LEDs and a  
269 piezo stage. Images were acquired over time with a Hamamatsu EMCCD camera controlled by the  
270 Metamorph (resp. Zen) software, at a rate of one z-stack every 5 to 15 min. Images were processed  
271 with the ImageJ software for registration (StackReg plugin), bleaching correction (Bleach Correction

272 plugin), background correction and smoothing. The length of the envelope and the leg (**Fig1c** and **FigS1**)  
273 was measured on image z-stacks, from the dorsal tip to the distal pole (envelope) and from the femur  
274 to the distal pole (leg) as indicated on **Fig1b**. The occurrence time of a particular event (**Fig1d** and  
275 **Fig4b**) was defined as the first timepoint when the event was visible.

## 276 **Laser dissection**

277 Laser dissection experiments were performed with a pulsed DPSS laser (532 nm, pulse length 1.5 ns,  
278 repetition rate up to 1 kHz, 3.5  $\mu$ J/pulse) steered by a galvanometer-based laser scanning device (DPSS-  
279 532 and UGA-42, from Rapp OptoElectronic, Hamburg, Germany). The laser beam was focused through  
280 an oil-immersion lens of high numerical aperture (Plan-Apochromat 63x/1.4 Imm Oil or LD LCI Plan-  
281 Apochromat 63x/1.2 multi-Imm, from Zeiss). Photo-disruption was produced in the focal plane by  
282 illuminating at 60 % laser power. To target intracellular structures, illumination duration was set at  
283 40 ms on a small spot focused on a filament or junction at zoom 2x. For the matrix layer, 20-40  $\mu$ m-  
284 long lines were illuminated for 50-100 ms at zoom 1x. Images were acquired every 200 ms to 400 ms  
285 during the experiment using a confocal laser scanning microscope (LSM-880, Zeiss) equipped with a  
286 488 nm Argon laser and a GaAsP photomultiplier. Data analysis was performed with the ImageJ  
287 software using a home-made macro.

## 288 **Statistics**

289 The statistical significance of the difference between occurrence times of particular events (**Fig4b**) was  
290 assessed using the one-sided Wilcoxon signed-rank test. Absolute time measurements were paired by  
291 leg disc. The null hypothesis was that the time difference values between envelope rupture (resp. leg  
292 bending) and envelope contraction were samples from a symmetric distribution centred below 0.  
293 Calculations were performed with R and p-values are indicated on the graph.

294

## 295 **Conflicts of interest**

296 There are no conflicts to declare.

297

298 **Author contribution:**

299 MS, BM and AP designed experiments. AP performed experiments and data analysis. BM constructed  
300 fly stocks. MS supervised the project.

301

302 **Acknowledgements:**

303 The authors express their thanks to E. Théveneau for MMP inhibitors, to T. Mangeat for help with laser  
304 dissection and to all team members for helpful discussion. They are grateful to J. Fouchard and  
305 G. Charras for insightful discussions.

306 MS's lab is supported by grants from the European Research Council (ERC) under the European Union  
307 Horizon 2020 research and innovation program (grant number EPAF: 648001), the Fondation Arc pour  
308 la Recherche sur le Cancer (CA 09-12-2014) and from the Institut National de la Santé et de la  
309 Recherche Médicale (Inserm, Plan cancer 2014-2019).

310

311 **References**

312

313 Aldaz, S., Escudero, L.M., and Freeman, M. (2010). Live imaging of *Drosophila* imaginal disc  
314 development. *Proc Natl Acad Sci U S A* 107, 14217-22.

315 Aldaz, S., Escudero, L.M., and Freeman, M. (2013). Dual role of myosin II during *Drosophila* imaginal  
316 disc metamorphosis. *Nat Commun* 4, 1761.

317 Bertet, C., Sulak, L., and Lecuit, T. (2004). Myosin-dependent junction remodelling controls planar cell  
318 intercalation and axis elongation. *Nature* 429, 667-71.

319 Blankenship, J.T., Backovic, S.T., Sanny, J.S., Weitz, O., and Zallen, J.A. (2006). Multicellular rosette  
320 formation links planar cell polarity to tissue morphogenesis. *Dev Cell* 11, 459-70.

321 Chen, C.S., Mrksich, M., Huang, S., Whitesides, G.M., and Ingber, D.E. (1997). Geometric control of  
322 cell life and death. *Science* 276, 1425-8.

323 Clément, R., Dehapiot, B., Collinet, C., Lecuit, T., and Lenne, P.F. (2017). Viscoelastic Dissipation  
324 Stabilizes Cell Shape Changes during Tissue Morphogenesis. *Curr Biol* 27, 3132-3142.e4.

325 Condic, M.L., Fristrom, D., and Fristrom, J.W. (1991). Apical cell shape changes during *Drosophila*  
326 imaginal leg disc elongation: a novel morphogenetic mechanism. *Development* 111, 23-33.

327 Discher, D.E., Mooney, D.J., and Zandstra, P.W. (2009). Growth factors, matrices, and forces combine  
328 and control stem cells. *Science* 324, 1673-7.

329 Fernandez-Gonzalez, R., and Zallen, J.A. (2011). Oscillatory behaviors and hierarchical assembly of  
330 contractile structures in intercalating cells. *Phys Biol* 8, 045005.

331 Fristrom, D., and Fristrom, J.W. (1993). The metamorphic development of the adult epidermis. In *The*  
332 *development of Drosophila melanogaster*, Bate, M. and Martinez Arias, A., ed. Cold Spring Harbor  
333 Laboratory Press).

334 Gilmour, D., Rembold, M., and Leptin, M. (2017). From morphogen to morphogenesis and back.  
335 *Nature* 541, 311-320.

- 336 Harris, A.R., Peter, L., Bellis, J., Baum, B., Kabla, A.J., and Charras, G.T. (2012). Characterizing the  
337 mechanics of cultured cell monolayers. *Proc Natl Acad Sci U S A* 109, 16449-54.
- 338 Heisenberg, C.P., and Bellaïche, Y. (2013). Forces in tissue morphogenesis and patterning. *Cell* 153,  
339 948-62.
- 340 Ingber, D.E. (2006). Mechanical control of tissue morphogenesis during embryological development.  
341 *Int J Dev Biol* 50, 255-66.
- 342 Janmey, P.A., Winer, J.P., Murray, M.E., and Wen, Q. (2009). The hard life of soft cells. *Cell Motil*  
343 *Cytoskeleton* 66, 597-605.
- 344 Keller, R. (2012). Developmental biology. Physical biology returns to morphogenesis. *Science* 338,  
345 201-3.
- 346 Lecuit, T., Lenne, P.F., and Munro, E. (2011). Force generation, transmission, and integration during  
347 cell and tissue morphogenesis. *Annu Rev Cell Dev Biol* 27, 157-84.
- 348 McClure, K.D., and Schubiger, G. (2005). Developmental analysis and squamous morphogenesis of  
349 the peripodial epithelium in *Drosophila* imaginal discs. *Development* 132, 5033-42.
- 350 Miller, R.T. (2017). Mechanical properties of basement membrane in health and disease. *Matrix Biol*  
351 57-58, 366-373.
- 352 Milner, M.J. (1977). The eversion and differentiation of *Drosophila melanogaster* leg and wing  
353 imaginal discs cultured in vitro with an optimal concentration of beta-ecdysone. *J Embryol Exp*  
354 *Morphol* 37, 105-17.
- 355 Milner, M.J., Bleasby, A.J., and Pyott, A. (1983). The role of the peripodial membrane in the  
356 morphogenesis of the eye-antennal disc of *Drosophila melanogaster*. *Wilehm Roux Arch Dev Biol* 192,  
357 164-170.
- 358 Monier, B., Gettings, M., Gay, G., Mangeat, T., Schott, S., Guarner, A., and Suzanne, M. (2015). Apico-  
359 basal forces exerted by apoptotic cells drive epithelium folding. *Nature* 518, 245-8.

360 Morin, X., Daneman, R., Zavortink, M., and Chia, W. (2001). A protein trap strategy to detect GFP-  
361 tagged proteins expressed from their endogenous loci in *Drosophila*. *Proc Natl Acad Sci U S A* 98,  
362 15050-5.

363 Royou, A., Sullivan, W., and Karsenti, R. (2002). Cortical recruitment of nonmuscle myosin II in early  
364 syncytial *Drosophila* embryos: its role in nuclear axial expansion and its regulation by Cdc2 activity. *J*  
365 *Cell Biol* 158, 127-37.

366 Srivastava, A., Pastor-Pareja, J.C., Igaki, T., Pagliarini, R., and Xu, T. (2007). Basement membrane  
367 remodeling is essential for *Drosophila* disc eversion and tumor invasion. *Proc Natl Acad Sci U S A* 104,  
368 2721-6.

369 Theodoris, A.D., Skandalis, S.S., Gialeli, C., and Karamanos, N.K. (2016). Extracellular matrix  
370 structure. *Adv Drug Deliv Rev* 97, 4-27.

371 von Kalm, L., Fristrom, D., and Fristrom, J. (1995). The making of a fly leg: a model for epithelial  
372 morphogenesis. *Bioessays* 17, 693-702.

373 Wyatt, T.P., Harris, A.R., Lam, M., Cheng, Q., Bellis, J., Dimitracopoulos, A., Kabla, A.J., Charras, G.T.,  
374 and Baum, B. (2015). Emergence of homeostatic epithelial packing and stress dissipation through  
375 divisions oriented along the long cell axis. *Proc Natl Acad Sci U S A* 112, 5726-31.

376



Figure 1:

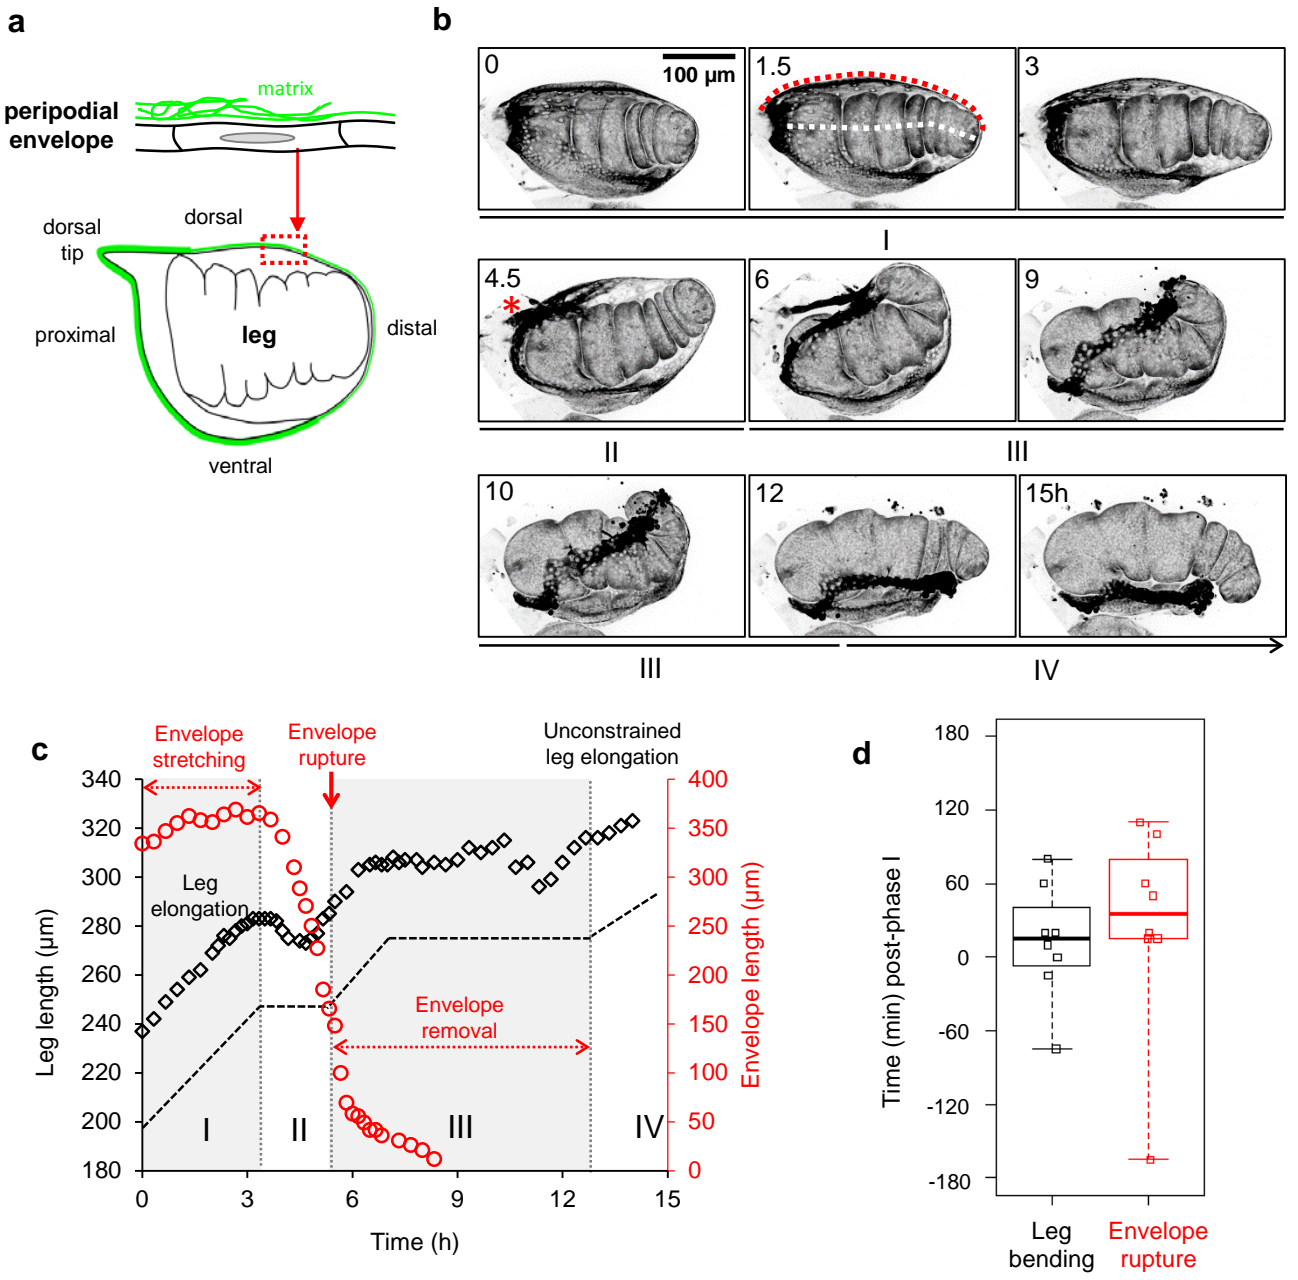

## Figure legends:

### Figure 1: Envelope stretching, tearing and removal during leg elongation.

**a.** Scheme of the leg disc at the start of elongation. The leg proper is surrounded by the peripodial envelope, composed of a thin squamous epithelial monolayer lying on a basement membrane. The basement membrane (green) is located on the outer side of the envelope.

**b.** Leg disc eversion in culture. Time-lapse confocal microscopy images (z-projections) of a leg disc expressing fluorescent myosin (*sqh::sqhGFP*). A red asterisk denotes rupture at the dorsal tip. See also **Movie 1**. Representative of over 100 leg discs. Dotted red and white lines at timepoint 1h30 outline respectively the length of the envelope and of the leg measured and shown in **c**.

**c.** Dynamics of leg elongation and envelope stretching. Length of the leg (black) shown in **b**. and of its envelope (red) over time. The black dashed line is a simplified view of leg elongation dynamics. Phases I-IV are described in the text. The dimensions measured on the tissue are indicated on **b**. (timepoint 1h30).

**d.** Occurrence times of leg bending and envelope rupture respectively, with respect to the end of phase I. Boxes show median and quartiles and whiskers encompass all values (8 leg discs).

Figure 2

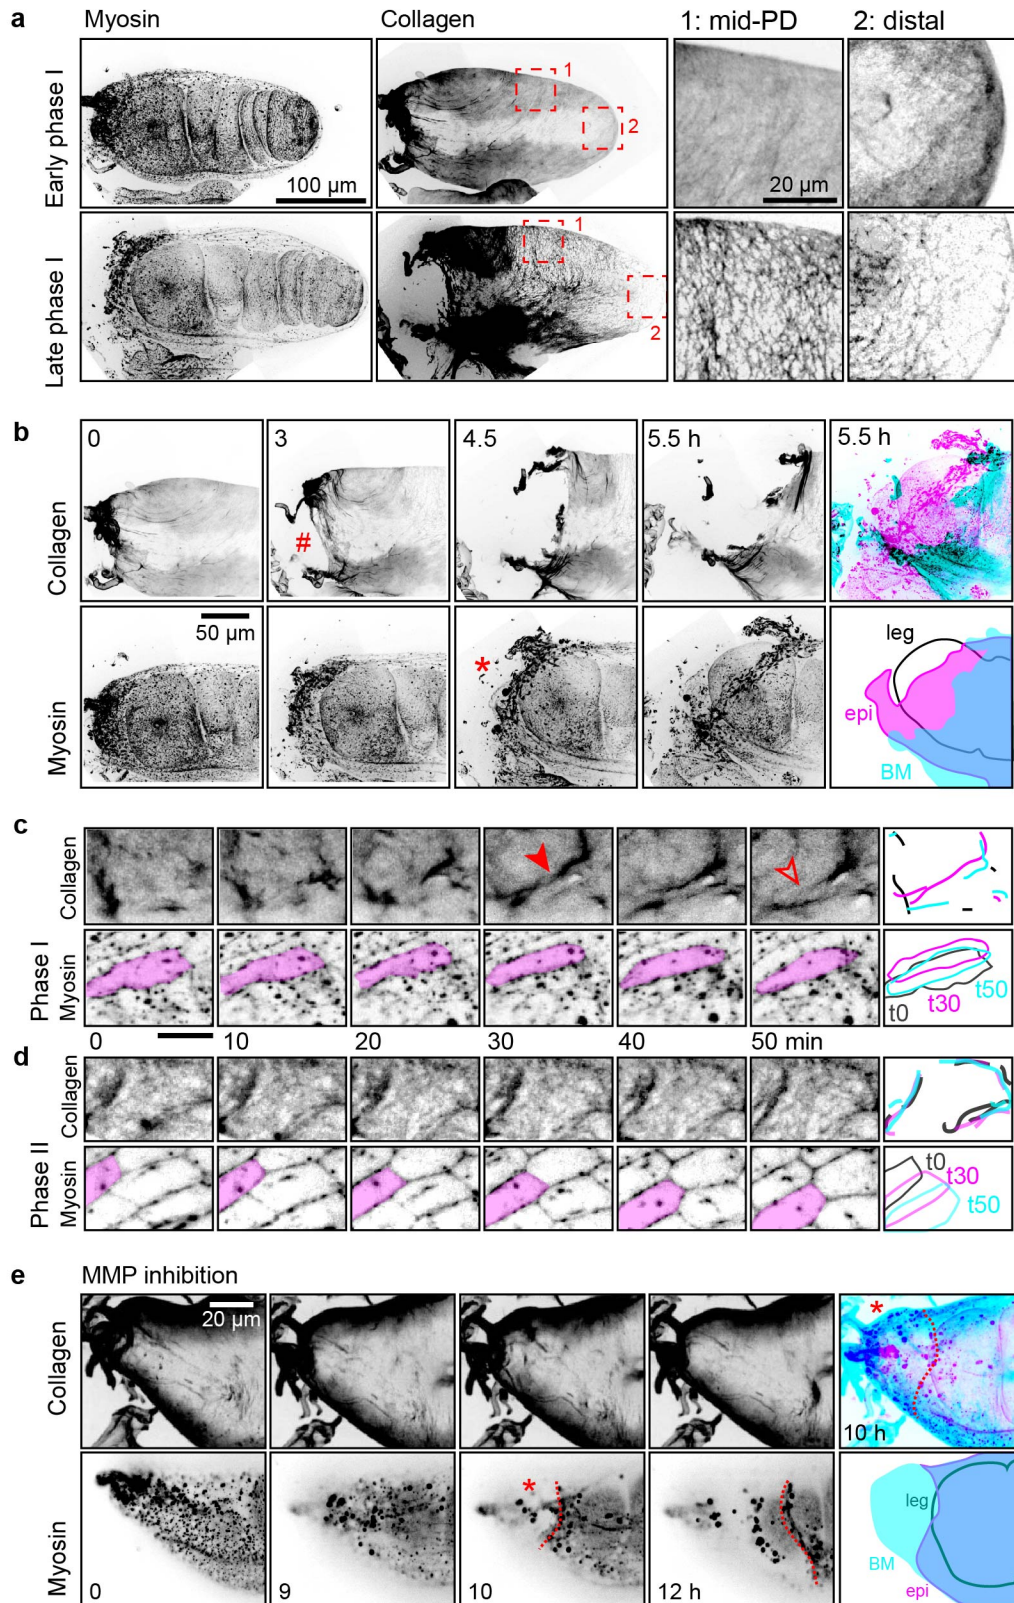

## Figure 2: Uncoupling of the ECM from the cell monolayer during envelope stretching

**a.** Confocal images (z-projections) of a leg disc (dorsal view) expressing fluorescent collagen (*vkg-GFP*) and myosin (*sqh-TagRFPT[9B]*), at the start (upper panels) and the end (lower panels) of phase I. Right panels: enlarged views of the regions enclosed in red dashed squares, at the middle of the proximal-distal axis (1) and at the distal region (2). Note that contrast was increased in the enlarged view of region 2. Representative of 19 leg discs.

**b.** Time-lapse confocal images (z-projections) of the proximal region of the same leg disc as **a.**, showing that the basement membrane ruptures before the epithelium (red hash, matrix rupture; red asterisk, epithelial rupture). Representative of 39 leg discs (collagen (*vkg-GFP*), 34, perlecan (*trol-GFP*), 5). See also **Movie 2**. Rightmost panels: merged images of collagen (cyan) and myosin (magenta) and corresponding outlines of the basement membrane (**BM**, cyan), the epithelium (**epi**, magenta) and the leg (**leg**, black).

**c-d.** Time-lapse confocal images (single planes) of the envelope of a leg disc (dorsal view). Top and bottom rows show collagen and myosin, respectively. Rightmost panels: schematics of matrix and cell dynamics at timepoints 0, 30 and 50 min (black, magenta and cyan respectively). **c.** During phase I, the matrix displays transient wrinkle formation (filled red arrowhead, wrinkling; open arrowhead, wrinkle flattening). These dynamics are associated with cell shrinkage (compare the shape of the magenta-colored cell at timepoints 0 and 30 min). **d.** During phase II, the matrix is uncoupled from the cell layer (see magenta-colored cell), which slides over without notably deforming the matrix. Scale bars: 20  $\mu\text{m}$ .

**e.** Time-lapse confocal images of the proximal region of an L3 leg disc expressing fluorescent collagen (*vkg-GFP*, z-projection) and myosin (*sqh-TagRFPT[9B]*, single plane), cultured with an MMP inhibitor (GM6001, 50  $\mu\text{M}$ ). Although the basement membrane is not degraded, epithelial rupture at the dorsal tip still occurs (red asterisk) and the free boundary of the tissue retracts (dotted red outline). Representative of 7 leg discs. Compare with **b.**, see also **Movie 3**. Rightmost panels: merged images (z-projections) of collagen (cyan) and myosin (magenta) at the onset of epithelial rupture and corresponding outlines of the basement membrane (**BM**, cyan), the epithelium (**epi**, magenta) and the leg (**leg**, black).

Figure 3:

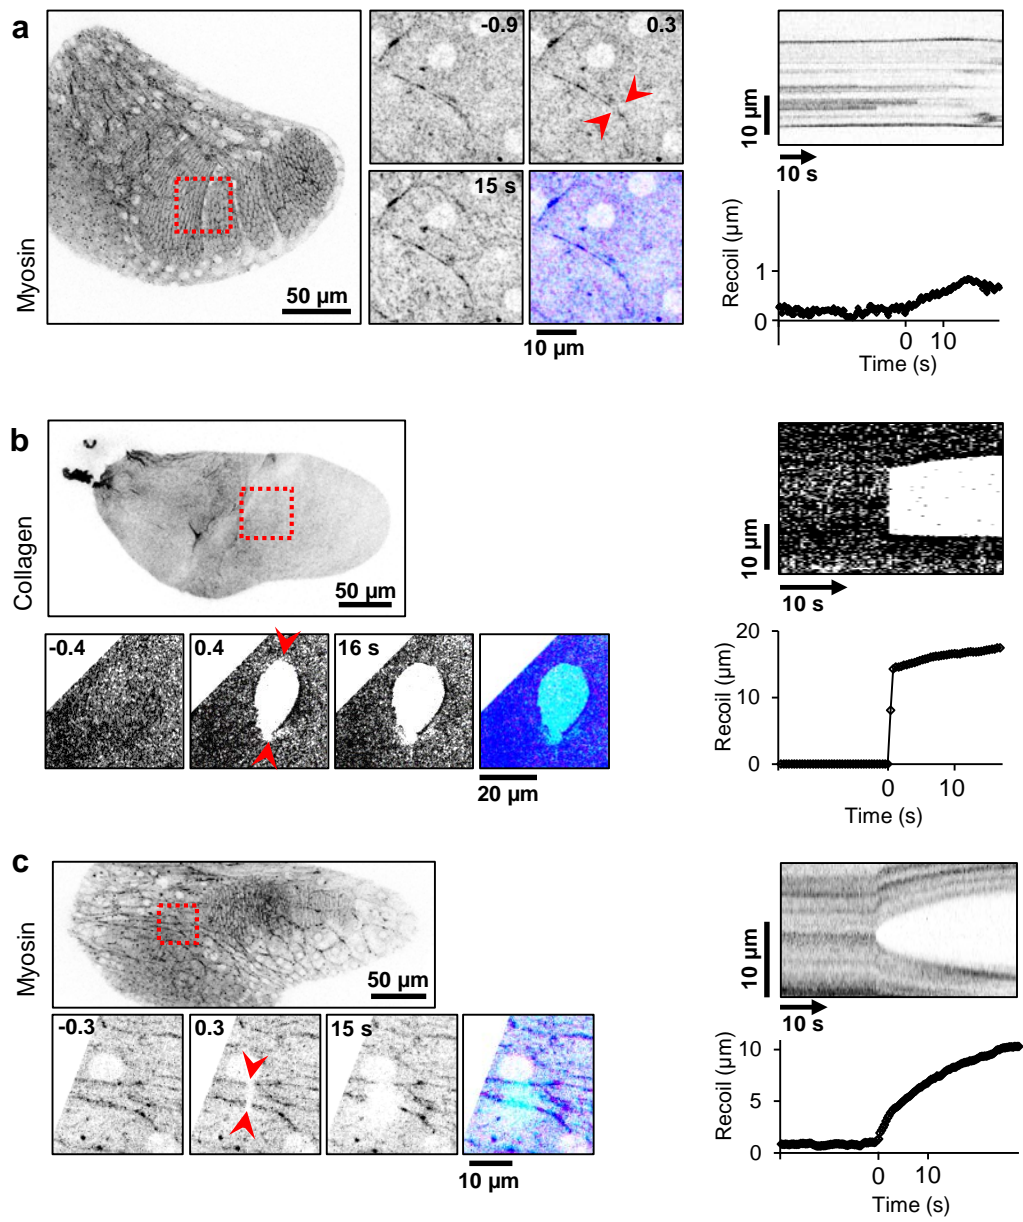

**Figure 3: Tension transfer from the ECM to the cell layer in a stretched epithelium.**

**a.** The monolayer bears little tension during phase I. Left: Laser dissection of myosin filaments in cells of the envelope of a leg disc expressing fluorescent myosin (*sqh-eGFP[29B]*) in early phase I. Myosin filaments (red arrowheads) were disrupted at timepoint 0 but no recoil was observed. Bottom right image: comparison of the filament before ( $t = -0.9$  s, cyan) and after dissection ( $t = 0.3$  s, magenta). Representative of 5 experiments. Right: Kymograph and curve showing recoil dynamics in a representative leg disc expressing fluorescent E-cadherin.

**b.** The basement membrane is under tension during phase I. Left: laser dissection of the ECM layer of the envelope of a leg disc expressing fluorescent collagen (*vkg-GFP*) in early phase I. The matrix layer was illuminated in a straight line (between the red arrowheads) at timepoint 0, leading to immediate retraction. Bottom right image: comparison before ( $t = -0.4$  s, cyan) and at the time of dissection ( $t = 16$  s, magenta). Representative of 5 experiments. Right: Kymograph and curve showing the recoil dynamics.

**c.** The monolayer is under tension during phase II. Left: laser dissection of myosin filaments in cells of the envelope of a leg disc in phase II. The myosin network was illuminated in a straight line (between the red arrowheads) at timepoint 0 and retraction was followed over time. Bottom right image: comparison before ( $t = -0.3$  s, cyan) and after retraction ( $t = 15$  s, magenta). Representative of 5 experiments. Right: Kymograph and curve showing the recoil dynamics.

Figure 4

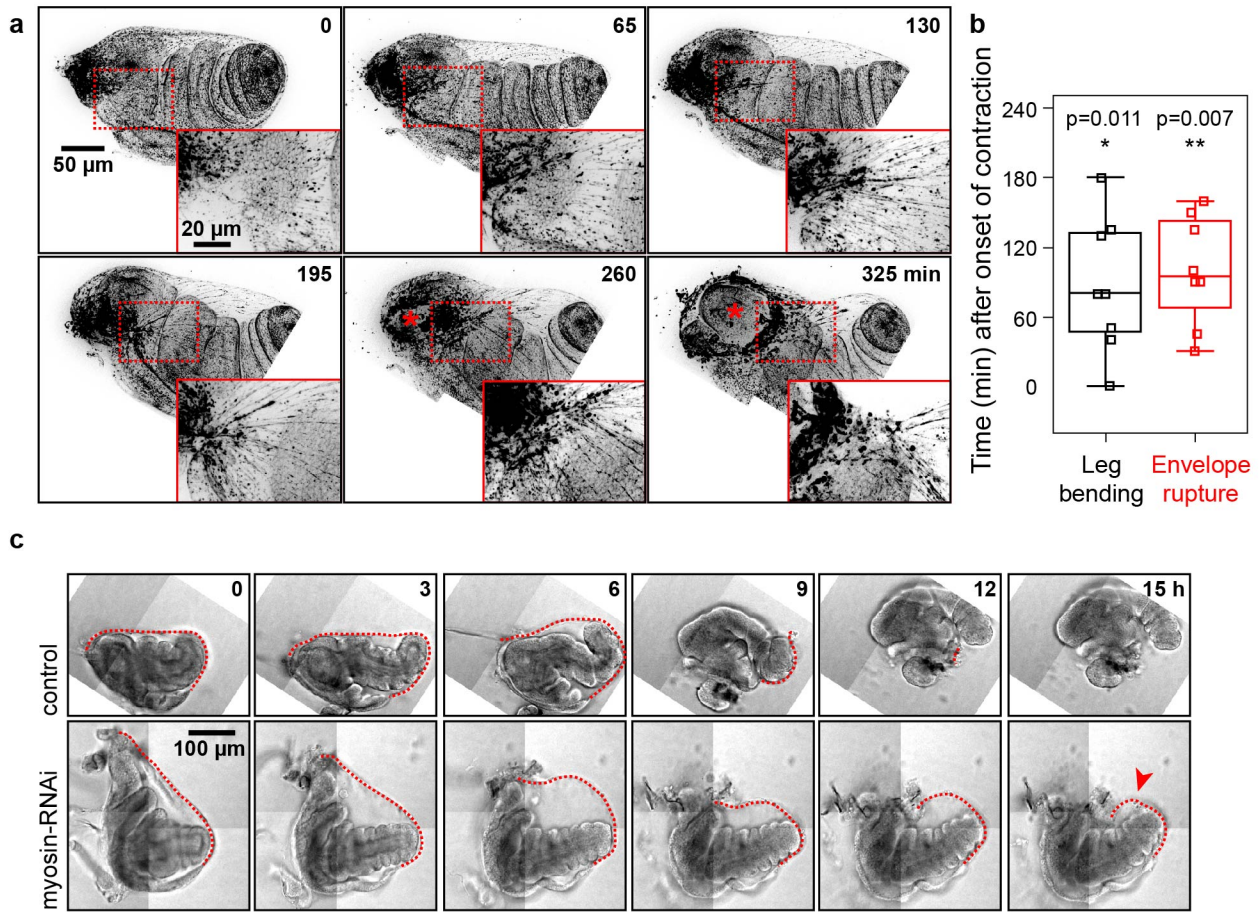

**Figure 4: The envelope actively withdraws by myosin-dependent contraction.**

**a.** Time-lapse confocal images (z-projection) of the rupture site in a leg disc (dorsal view) expressing fluorescent myosin (*sqh-TagRFPT[9B]*) and showing the formation of myosin cables (red arrowheads) radially distributed just distally from the rupture site. Representative of 9 legs. Red asterisk indicates the hole in the epithelium after rupture. Insets: enlarged views of the dotted red rectangle around the myosin cables before the rupture site. Scale bar: 50  $\mu\text{m}$ . See also **Movie 4**.

**b.** Occurrence times of leg bending and envelope rupture respectively, with respect to the onset of envelope contraction. Boxes show median and quartiles and whiskers encompass all values (8 leg discs). p-values indicate the statistical significance that these events occur after contraction, as assessed by the one-sided Wilcoxon signed-rank test between the absolute time values paired per leg disc.

**c.** Time-lapse bright-field images of a leg disc expressing myosin-RNAi in the envelope (*c855 $\alpha$ -Gal4 > UAS-*zip*-RNAi*, bottom row) compared to a control leg disc (*UAS-*zip*-RNAi*, top row). Myosin depletion prevents retraction of the peripodial envelope (red arrowhead). Representative of 7 legs. Red dashed line outlines the envelope over time.



Figure 5:

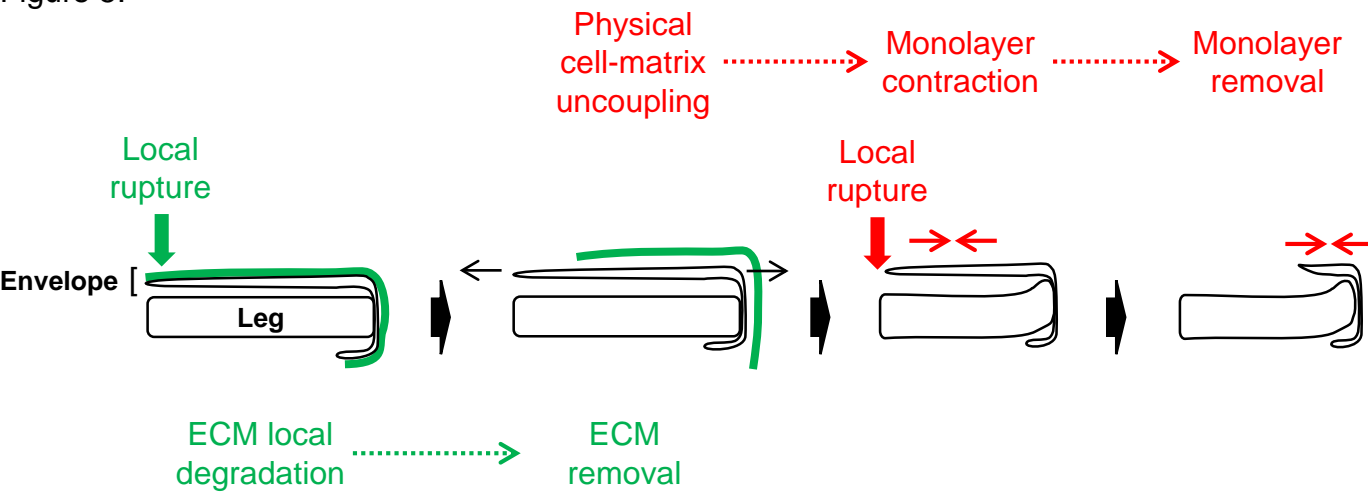

**Figure 5: Model of the biochemical and physical processes involved in leg disc envelope removal. .**

Both layers of the envelope behave independently in terms of tension, rupture and withdrawal. The ECM (green layer) undergoes local proteolysis early on, before rupturing and physically detaching from the cell monolayer (green sequence). The monolayer then increases its contractility, ruptures and then retracts through autonomous contraction (red sequence).

Figure S1:

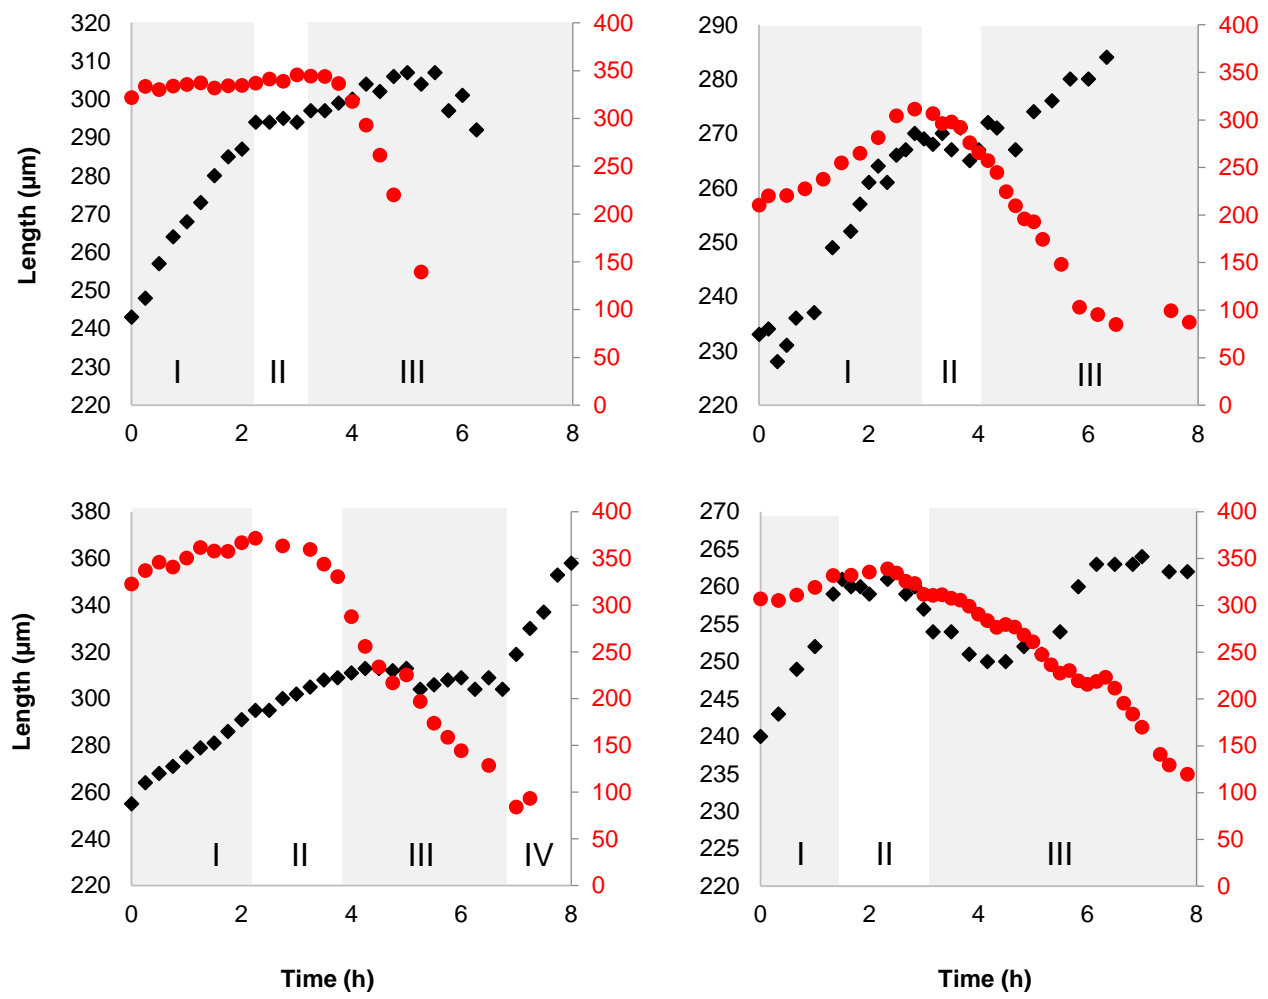

**Figure S1: Related to Figure 1. Envelope rupture and withdrawal are coordinated with leg disc elongation dynamics.**

Dynamics of leg elongation and envelope stretching for 4 leg discs. Length of the leg (black) and of the envelope (red) over time, measured as indicated on **Fig1b**. Phases I-IV are described in the text.

## Supplementary figure legends

### **Figure S1: Related to Figure 1. Envelope dynamics during leg elongation.**

Dynamics of leg elongation and envelope stretching for 4 leg discs. Length of the leg (black) and of the envelope (red) over time, measured as indicated on **Fig1b**. Phases I-IV are described in the text.

### **Movie legends:**

#### **Movie 1. Related to Figure 1b. Envelope stretching, tearing and removal during leg elongation.**

Leg disc eversion in culture. Time-lapse confocal microscopy images (z-projections) of a leg disc expressing fluorescent myosin. Tissue orientation follows **Fig1a** (dorsal-ventral from top to bottom, proximal-distal from left to right). Image stacks were acquired every 10 min.

#### **Movie 2. Related to Figure 2b. Uncoupling of the ECM from the cell monolayer during envelope stretching.**

Time-lapse confocal images (z-projections) of a leg disc expressing fluorescent collagen and myosin during phase I. Image stacks were acquired every 7.5 min.

#### **Movie 3. Related to Figure 2e. Matrix degradation is not required for envelope rupture.**

Time-lapse confocal images (z-projections) of the proximal region of an L3 leg disc expressing fluorescent collagen and myosin, cultured with an MMP inhibitor. Image stacks were acquired every 15 min.

#### **Movie 4. Related to Figure 4a. Myosin in the envelope organizes into cable-like structures before contraction and rupture.**

Time-lapse confocal images (z-projection) of the rupture site of a leg disc expressing fluorescent myosin. Image stacks were acquired every 5 min.
